# Supplementary material
Source: PubMed Central journal article supplement (PMC7572882)
Supplement: NIHMS1631266-supplement-1.pdf [file NIHMS1631266-supplement-1.pdf]

**Cholesterol pathway inhibition induces TGF $\beta$  signaling to promote basal differentiation in pancreatic cancer**

Linara Gabitova-Cornell, *et al.*, Igor Astsaturov

**SUPPLEMENTARY FIGURES AND LIST OF SUPPLEMENTARY TABLES**

# SUPPLEMENTARY FIGURES

## Figure S1

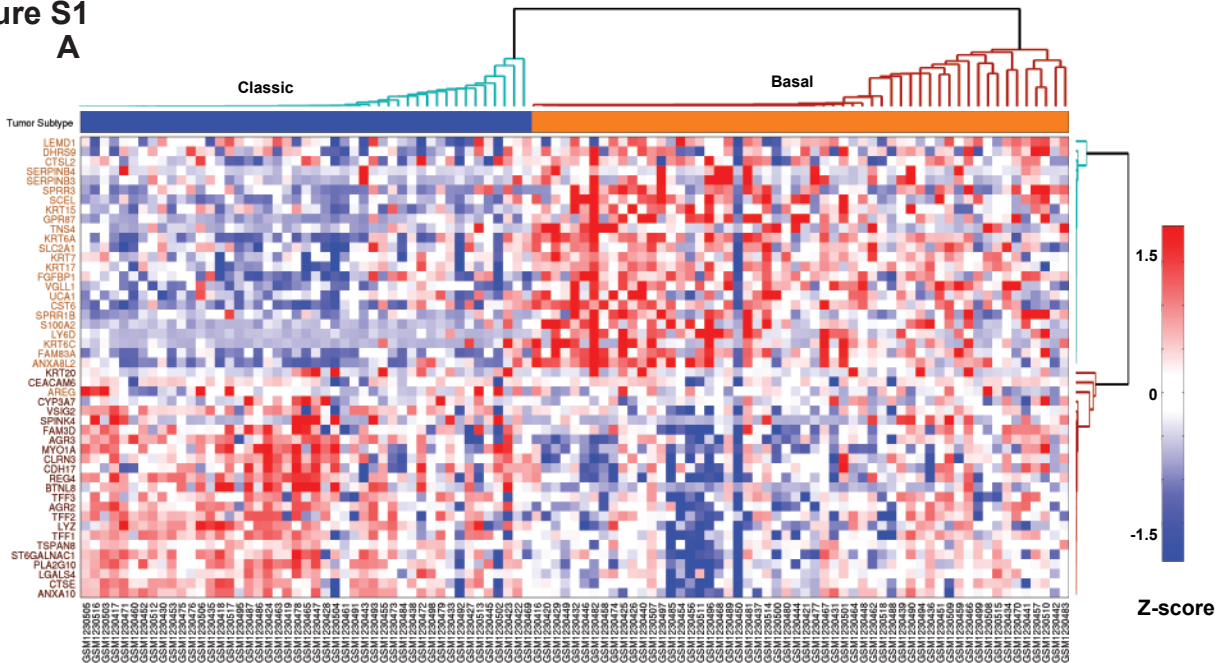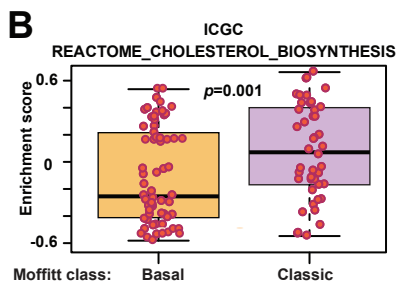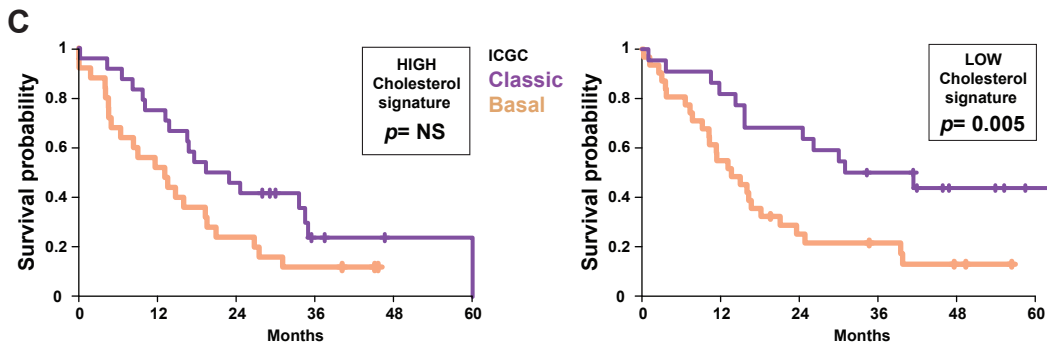

**Figure S1. Analysis of mRNA signatures of pancreatic adenocarcinoma reported by the International Cancer Genome Consortium (ICGC, GSE50827). Related to figure 1.**

(A) Heat map of unsupervised clustering analysis of 103 PDAC cases from ICGC based of gene expression signatures segregating classic or basal subsets by a weighted gene expression algorithm (Moffitt et al., 2015). Z-scores calculated for each gene are plotted on a red (higher expression) and blue (low expression) scale.

(B) Comparison of Reactome “cholesterol biosynthesis” signature genes expression in basal and classic PDAC cases from ICGC (n=103).

(C) Kaplan-Meyer survival of 102 PDAC cases from ICGC dataset stratified by *Reactome\_cholesterol\_biosynthesis* gene signature and Moffitt basal or classic subset assignment. One case was excluded due to early death after surgery.

**Figure S2**

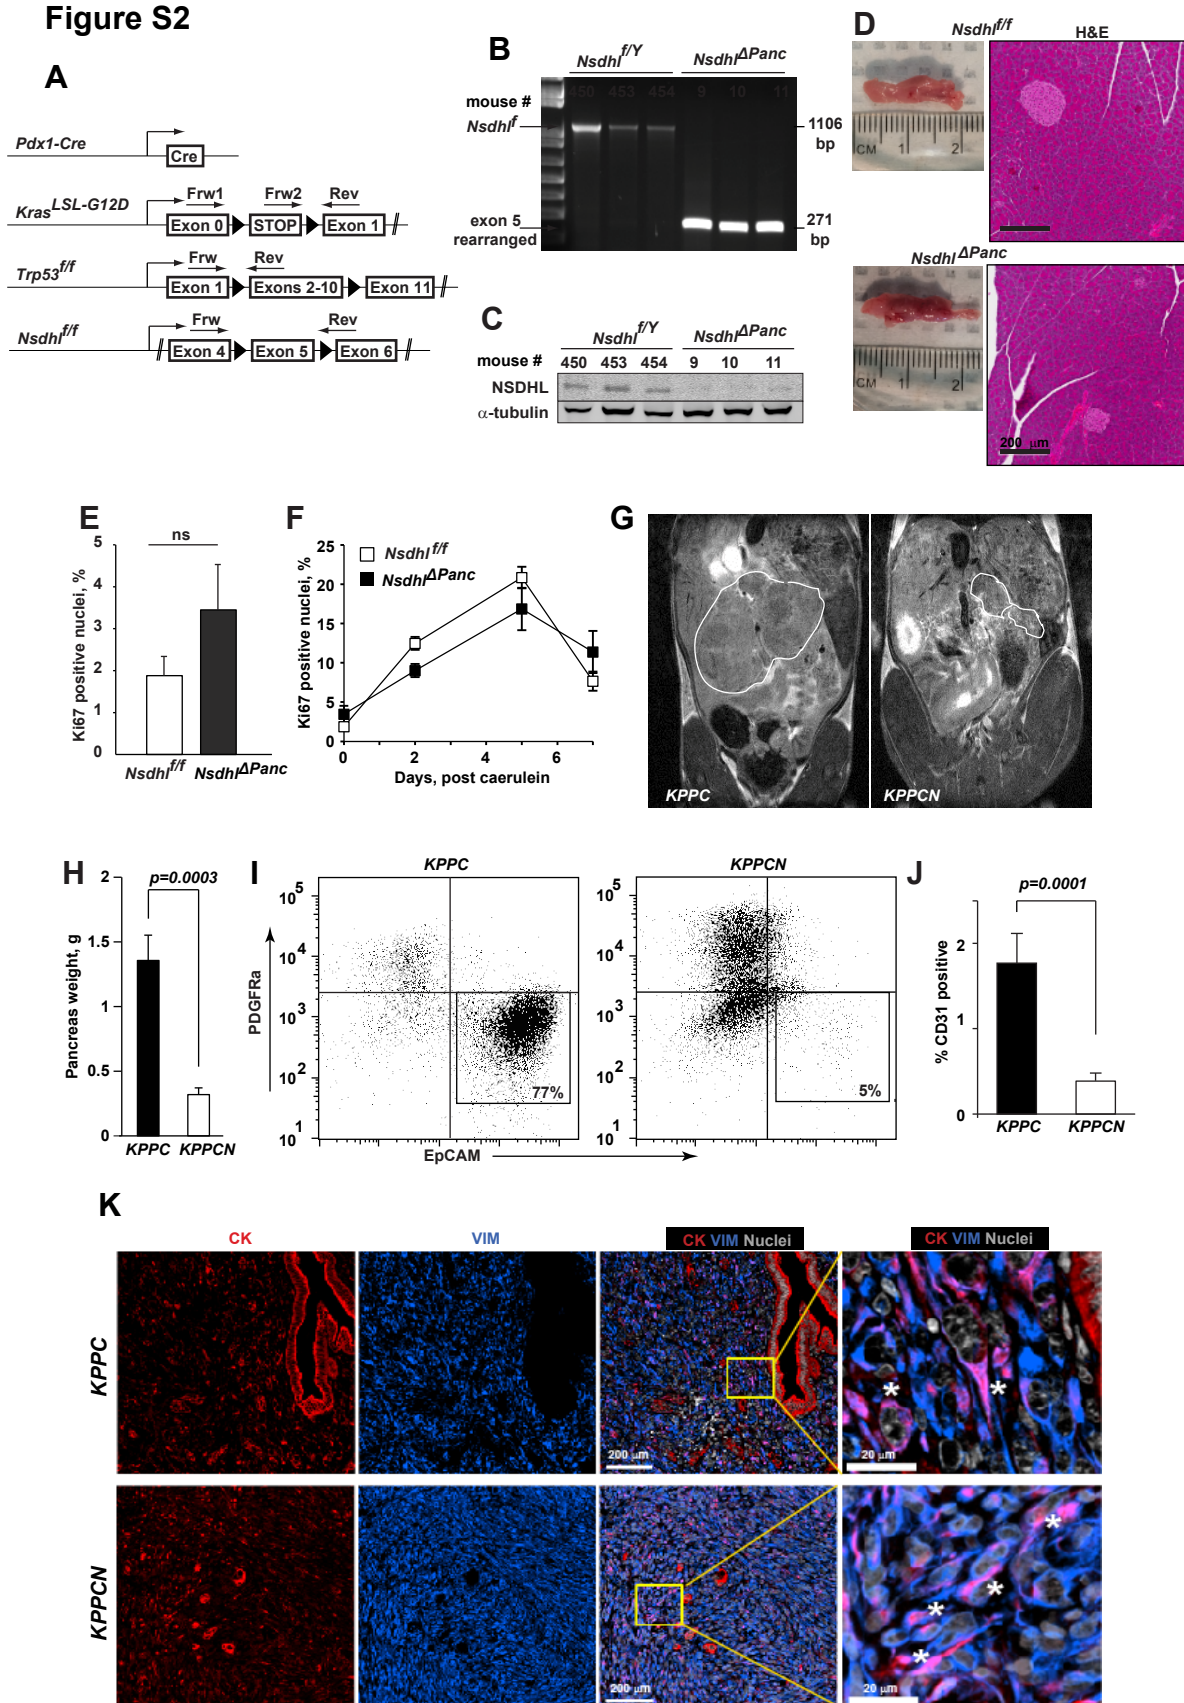

**Figure S2. Development of basal PDAC in mice with conditional knockout of *Nsdhl* in pancreatic epithelial cells. Related to figure 2.**

**(A)** Schema of KPC and KPCN genetic constructs. *Thick arrowheads*, *loxP* sites. *Frw* and *Rev*, location of genotyping primers (see STAR METHODS).

**(B)** Representative PCR products confirming rearrangement of *Nsdhl<sup>f</sup>* locus in males (*Nsdhl* is localized to the X-chromosome).

**(C)** Representative Western blot indicating loss of expression of NSDHL in pancreatic tissues of *Pdx1-Cre*-positive males. Similar findings were observed in homozygous *Nsdhl<sup>ff</sup>* females (not shown).

**(D)** Representative images of *Nsdhl<sup>ΔPanc</sup>* versus *Nsdhl<sup>ff</sup>* pancreas.

**(E)** Quantification of Ki-67-positive nuclei as an indicator of proliferation in *Nsdhl<sup>ΔPanc</sup>* versus *Nsdhl<sup>ff</sup>* pancreatic tissues.

**(F)** Quantification of Ki-67-positive nuclei as an indicator of reparative proliferation following acute caerulein-induced pancreatic injury in pancreatic epithelial cells of *Nsdhl<sup>ΔPanc</sup>* and *Nsdhl<sup>ff</sup>* mice.

**(G)** Micro-MRI images of littermate mice of indicated genotypes, with outlined pancreatic tissues.

**(H)** Pancreas weights in *KPPC* and *KPPCN* mice at 7-8 weeks of age; \*,  $p=0.0003$ .

**(I)** Expression of PDGFR $\alpha$  and EpCAM in representative *KPPC* and *KPPCN* tumors as determined by fluorescent activated cell sorting (FACS).

**(J)** Quantification of CD31 (PECAM) positive areas on tumor sections indicative of vascular endothelial cells;  $n=5$  pancreatic tumors of each genotype.

**(K)** Representative images of multiplex immunofluorescence characterization of *KPPC* (top) and *KPPCN* (bottom) carcinoma, depicting cytokeratin (CK) positive cells in red, vimentin (Vim) positive cells in blue, and overlay for double-positive cells in purple. *Asterisks*, denote double-positive (CK+, VIM+) cells. In all graphs, error bars, SEM; indicated  $p$ -values by Wilcoxon test.

**Table S3. Histological characterization of mouse adenocarcinoma. Related to Figure 2.**

| Sample#                    | PDAC histology                                          | Age, days | Dominant PDAC component | PDAC grade | % high grade area |
|----------------------------|---------------------------------------------------------|-----------|-------------------------|------------|-------------------|
| Genotype <i>KPC</i> , n=24 |                                                         |           |                         |            |                   |
| 13-5309                    | Early adenocarcinoma                                    | 129       | glandular               | 1          | 0                 |
| 13-5311                    | Differentiated adenocarcinoma                           | 126       | glandular               | 1          | 0                 |
| 14-4602                    | Differentiated adenocarcinoma                           | 142       | glandular               | 1          | 0                 |
| 14-4605                    | Poorly differentiated adenocarcinoma                    | 197       | solid                   | 3          | 50                |
| 14-4612                    | Differentiated adenocarcinoma                           | 154       | glandular               | 1          | 10                |
| 14-4619                    | Moderately differentiated adenocarcinoma                | 122       | glandular               | 2          | 0                 |
| 14-4624                    | Moderately differentiated adenocarcinoma                | 153       | glandular               | 2          | 20                |
| 15-0824                    | Moderately differentiated adenocarcinoma                | 170       | glandular               | 2          | 10                |
| 15-0835                    | Differentiated adenocarcinoma                           | 146       | glandular               | 1          | 0                 |
| 15-0847                    | Moderately differentiated adenocarcinoma                | 167       | glandular               | 2          | 10                |
| 15-0848                    | Cystic adenocarcinoma                                   | 167       | glandular               | 1          | 0                 |
| 15-0859                    | Differentiated adenocarcinoma                           | 101       | glandular               | 1          | 0                 |
| 15-0869                    | Small focus, moderately differentiated adenocarcinoma   | 90        | glandular               | 2          | 10                |
| 15-0870                    | Differentiated adenocarcinoma                           | 90        | glandular               | 1          | 0                 |
| 15-0871                    | Moderately differentiated adenocarcinoma with necrosis  | 136       | glandular               | 2          | 10                |
| 16-1903                    | Small focus of moderately differentiated adenocarcinoma | 141       | glandular               | 2          | 0                 |
| 16-1913                    | Poorly differentiated adenocarcinoma with necrosis      | 142       | glandular               | 3          | 10                |
| 16-1917                    | Poorly differentiated adenocarcinoma                    | 111       | solid                   | 3          | 50                |
| 16-1919                    | Poorly differentiated adenocarcinoma                    | 111       | glandular               | 3          | 50                |
| 16-1920                    | Small focus of differentiated adenocarcinoma            | 85        | glandular               | 1          | 0                 |
| 16-1925                    | Differentiated adenocarcinoma                           | 112       | glandular               | 1          | 0                 |
| 16-1931                    | Moderately differentiated adenocarcinoma                | 111       | glandular               | 2          | 10                |
| 16-1944                    | Small focus, adenocarcinoma                             | 56        | glandular               | 1          | 10                |
| 16-1958                    | Moderately differentiated adenocarcinoma                | 84        | glandular               | 2          | 0                 |
| Genotype <i>KPCN</i> , n=3 |                                                         |           |                         |            |                   |
| 17-0188                    | Undifferentiated adenocarcinoma with sarcomatoid growth | 122       | solid                   | 4          | 70                |
| 17-5817                    | Undifferentiated adenocarcinoma with sarcomatoid growth | 170       | solid                   | 4          | 90                |
| 18-5102                    | Poorly differentiated adenocarcinoma                    | 191       | solid                   | 3          | <10%              |

**Table S3 (continued). Histological characterization of mouse adenocarcinoma.**

| Sample ID                    | PDAC histology                                          | Age, days | Dominant PDAC component | PDAC Grade | % high grade area |
|------------------------------|---------------------------------------------------------|-----------|-------------------------|------------|-------------------|
| Genotype <i>KPPC</i> , n=15  |                                                         |           |                         |            |                   |
| 15-2865                      | Differentiated adenocarcinoma                           | 54        | glandular               | 1          | 10                |
| 15-2866                      | Differentiated adenocarcinoma                           | 51        | glandular               | 1          | 0                 |
| 15-2867                      | Moderately differentiated adenocarcinoma                | 51        | glandular               | 2          | 10                |
| 16-3827                      | Differentiated adenocarcinoma                           | 63        | glandular               | 1          | 20                |
| 16-3829                      | Moderately differentiated adenocarcinoma                | 63        | glandular               | 2          | 10                |
| 17-0022                      | Differentiated adenocarcinoma                           | 32        | glandular               | 1          | 10                |
| 17-0197                      | Moderately differentiated adenocarcinoma                | 66        | glandular               | 2          | 10                |
| 17-0198                      | Differentiated adenocarcinoma                           | 70        | glandular               | 1          | <10               |
| 18-5014                      | Differentiated adenocarcinoma                           | 64        | glandular               | 1          | <10               |
| 18-5015                      | Differentiated adenocarcinoma                           | 64        | glandular               | 1          | 0                 |
| 18-5019                      | Poorly differentiated adenocarcinoma                    | 51        | glandular/solid         | 3          | 30                |
| 18-5020                      | Differentiated adenocarcinoma                           | 66        | glandular               | 1          | 0                 |
| 18-5098                      | Differentiated adenocarcinoma                           | 54        | glandular               | 1          | 0                 |
| 18-5099                      | Moderately differentiated adenocarcinoma                | 61        | glandular               | 2          | 30                |
| 18-5100                      | Moderately differentiated adenocarcinoma                | 65        | glandular               | 2          | 20                |
| Genotype <i>KPPCN</i> , n=25 |                                                         |           |                         |            |                   |
| 16-3892                      | Microfocus of undifferentiated adenocarcinoma           | 56        | solid                   | 4          | 100               |
| 16-3910                      | Microfocus of undifferentiated adenocarcinoma           | 57        | solid                   | 4          | 100               |
| 16-3911                      | Microfocus of undifferentiated adenocarcinoma           | 57        | solid                   | 4          | 100               |
| 17-0020                      | Undifferentiated adenocarcinoma                         | 82        | solid                   | 4          | 90                |
| 17-0036                      | Undifferentiated adenocarcinoma                         | 94        | solid                   | 4          | 80                |
| 17-0179                      | Undifferentiated adenocarcinoma                         | 86        | solid                   | 4          | 100               |
| 17-0183                      | Microfocus of undifferentiated adenocarcinoma           | 78        | solid                   | 4          | 100               |
| 17-0184                      | Differentiated adenocarcinoma                           | 69        | glandular               | 1          | 20                |
| 17-0185                      | Undifferentiated adenocarcinoma with sarcomatoid growth | 84        | solid                   | 4          | 90                |
| 17-0186                      | Undifferentiated adenocarcinoma                         | 75        | solid                   | 4          | 100               |
| 17-0189                      | Undifferentiated adenocarcinoma                         | 80        | solid                   | 4          | 90                |
| 17-5809                      | Poorly differentiated adenocarcinoma                    | 68        | glandular               | 2          | 30                |
| 17-5814                      | Undifferentiated adenocarcinoma with sarcomatoid growth | 78        | solid                   | 4          | 90                |
| 17-5815                      | Undifferentiated adenocarcinoma with                    | 83        | solid                   | 4          | 100               |

|         |                                                         |    |                     |     |     |
|---------|---------------------------------------------------------|----|---------------------|-----|-----|
|         | sarcomatoid growth                                      |    |                     |     |     |
| 17-5822 | Differentiated adenocarcinoma                           | 86 | glandular           | 1   | 20  |
| 17-5823 | Moderately differentiated adenocarcinoma                | 71 | glandular           | 2   | 30  |
| 17-6714 | Moderately differentiated adenocarcinoma                | 57 | glandular           | 2   | 10  |
| 18-5016 | Undifferentiated adenocarcinoma                         | 75 | solid               | 4   | 70  |
| 18-5088 | Moderately differentiated adenocarcinoma                | 86 | glandular           | 2   | 30  |
| 18-5091 | Undifferentiated adenocarcinoma with sarcomatoid growth | 71 | solid               | 4   | 100 |
| 18-5092 | Undifferentiated adenocarcinoma with sarcomatoid growth | 88 | solid               | 4   | 100 |
| 18-5093 | Undifferentiated adenocarcinoma with sarcomatoid growth | 88 | solid               | 4   | 100 |
| 18-5094 | Undifferentiated adenocarcinoma with sarcomatoid growth | 87 | solid               | 4   | 90  |
| 18-5095 | Undifferentiated adenocarcinoma with sarcomatoid growth | 70 | solid               | 4   | 80  |
| 18-5097 | Poorly differentiated adenocarcinoma                    | 77 | solid and glandular | 3&4 | 50  |

---

Genotype ***KPPC treated with Atorvastatin***, n=12

---

|         |                                                         |    |           |   |    |
|---------|---------------------------------------------------------|----|-----------|---|----|
| 19-2530 | Adenocarcinoma                                          | 54 | glandular | 1 | 20 |
| 19-2533 | Undifferentiated adenocarcinoma                         | 61 | solid     | 4 | 60 |
| 19-2534 | Adenocarcinoma                                          | 70 | glandular | 1 | 10 |
| 19-2535 | Undifferentiated adenocarcinoma with sarcomatoid growth | 57 | solid     | 4 | 70 |
| 19-2536 | Undifferentiated adenocarcinoma with sarcomatoid growth | 55 | solid     | 3 | 40 |
| 19-2542 | Adenocarcinoma                                          | 65 | glandular | 1 | 30 |
| 19-2543 | Adenocarcinoma                                          | 65 | glandular | 2 | 30 |
| 19-2544 | Adenocarcinoma                                          | 59 | glandular | 2 | 10 |
| 19-2545 | Adenocarcinoma                                          | 64 | glandular | 1 | 20 |
| 19-2546 | Undifferentiated adenocarcinoma with sarcomatoid growth | 64 | solid     | 4 | 60 |
| 19-2547 | Adenocarcinoma                                          | 66 | glandular | 1 | 30 |
| 19-2548 | Adenocarcinoma                                          | 66 | glandular | 2 | 40 |



**Figure S3**

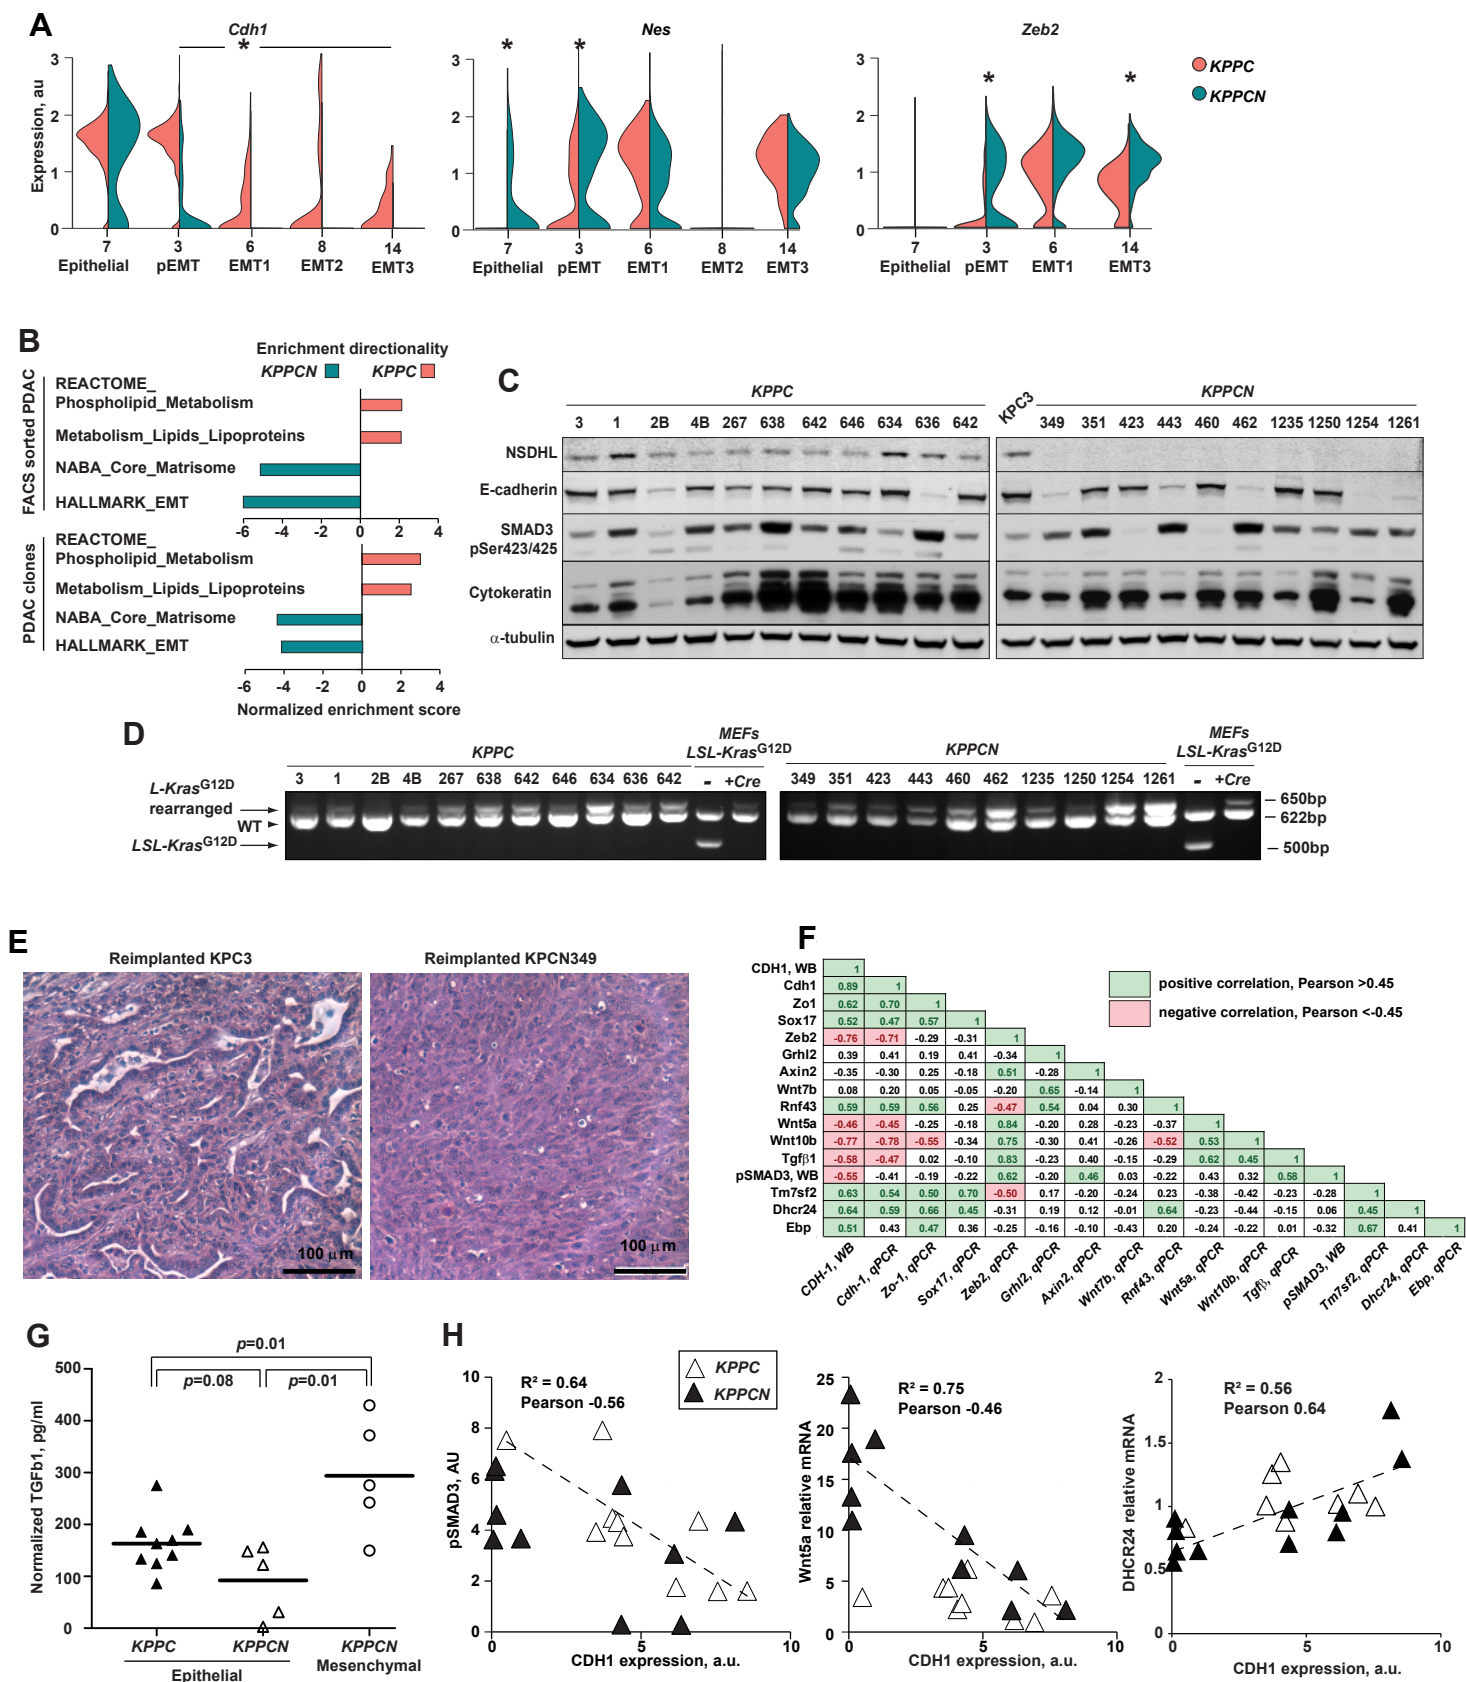

**Figure S3. *Nsdhl* knockout promotes epithelial-to-mesenchymal transition. Related to figure 3.**

(A) Violin plot of normalized expression of *Cdh1*, *Nes* and *Zeb2* in tumor cells corresponding to the indicated clusters; \*, false discovery rate-adjusted  $p < 10^{-10}$  are shown for significant differences. *Y-axis*, normalized expression; *violin width*, cell density in each population.

(B) Normalized enrichment scores for FACS-sorted primary PDAC cells (n=3 of each genotype) and PDAC clones (n=3 of each genotype). Shown are selected signatures with family-wise error rate, FWER < 5%.

(C) Western blot of lysates from *KPPC* and *KPPCN* clones illustrating expression of pancreatic adenocarcinoma differentiation markers.

(D) PCR products confirming fully excised STOP sequence in *LSL-KRas<sup>G12D</sup>* knock-in gene (bottom band ~500 bp) in indicated mouse PDAC cell lines.

(E) Representative hematoxylin-eosin images of pancreatic tumors arising from orthotopically implanted well-differentiated *KPPC* (KPC3) and basal *KPPCN* (KPCN349) pancreatic carcinoma. Scale bars, 100  $\mu$ m.

(F) Pearson correlation coefficients for multiple PDAC differentiation markers characterizing *KPPC* and *KPPCN* cell lines.

(G) Secreted TGFB1 in culture supernatants of *KPPC* and *KPPCN* cell lines; indicated *p*-values by Mann-Whitney test.

(H) Correlation of CDH1 expression with level of phosphorylated SMAD2/3, and mRNA for WNT5A and DHCR24, in *KPPC* and *KPPCN* clones; a.u., arbitrary units; R, correlation coefficient.

Figure S4

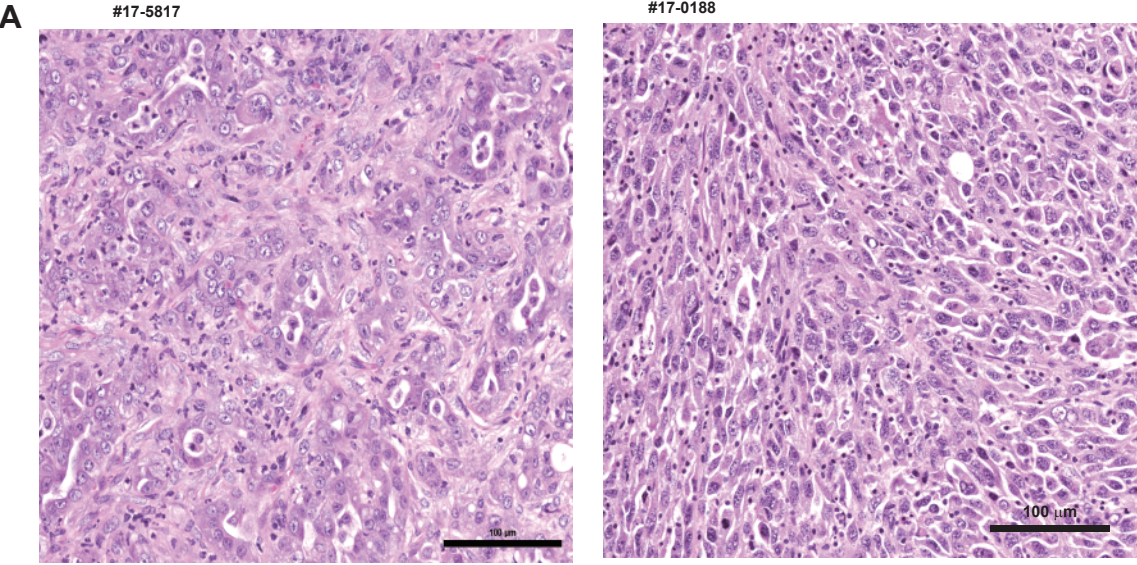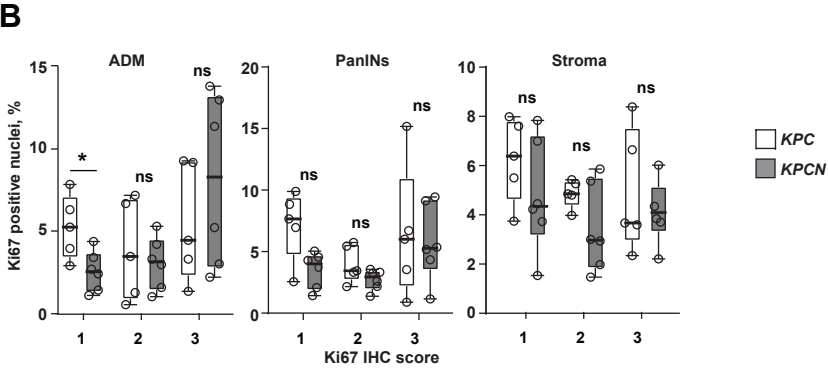

**Figure S4. Pancreatic cancer prevention in *Nsdhl* conditional knockout depends on *Trp53*.**

**Related to figure 4.**

(A) Hematoxylin and eosin images of grade 4 PDAC in two *KPCN* mice.

(B) Enumeration of Ki67-positive cells in pancreatic lesions and stromal cells in *KPC* and *KPCN* mice. \*,  $p < 0.05$ ; ns, not significant, Wilcoxon test. Boxplots represent median (black bar) and full range of measurements.

**Figure S5**

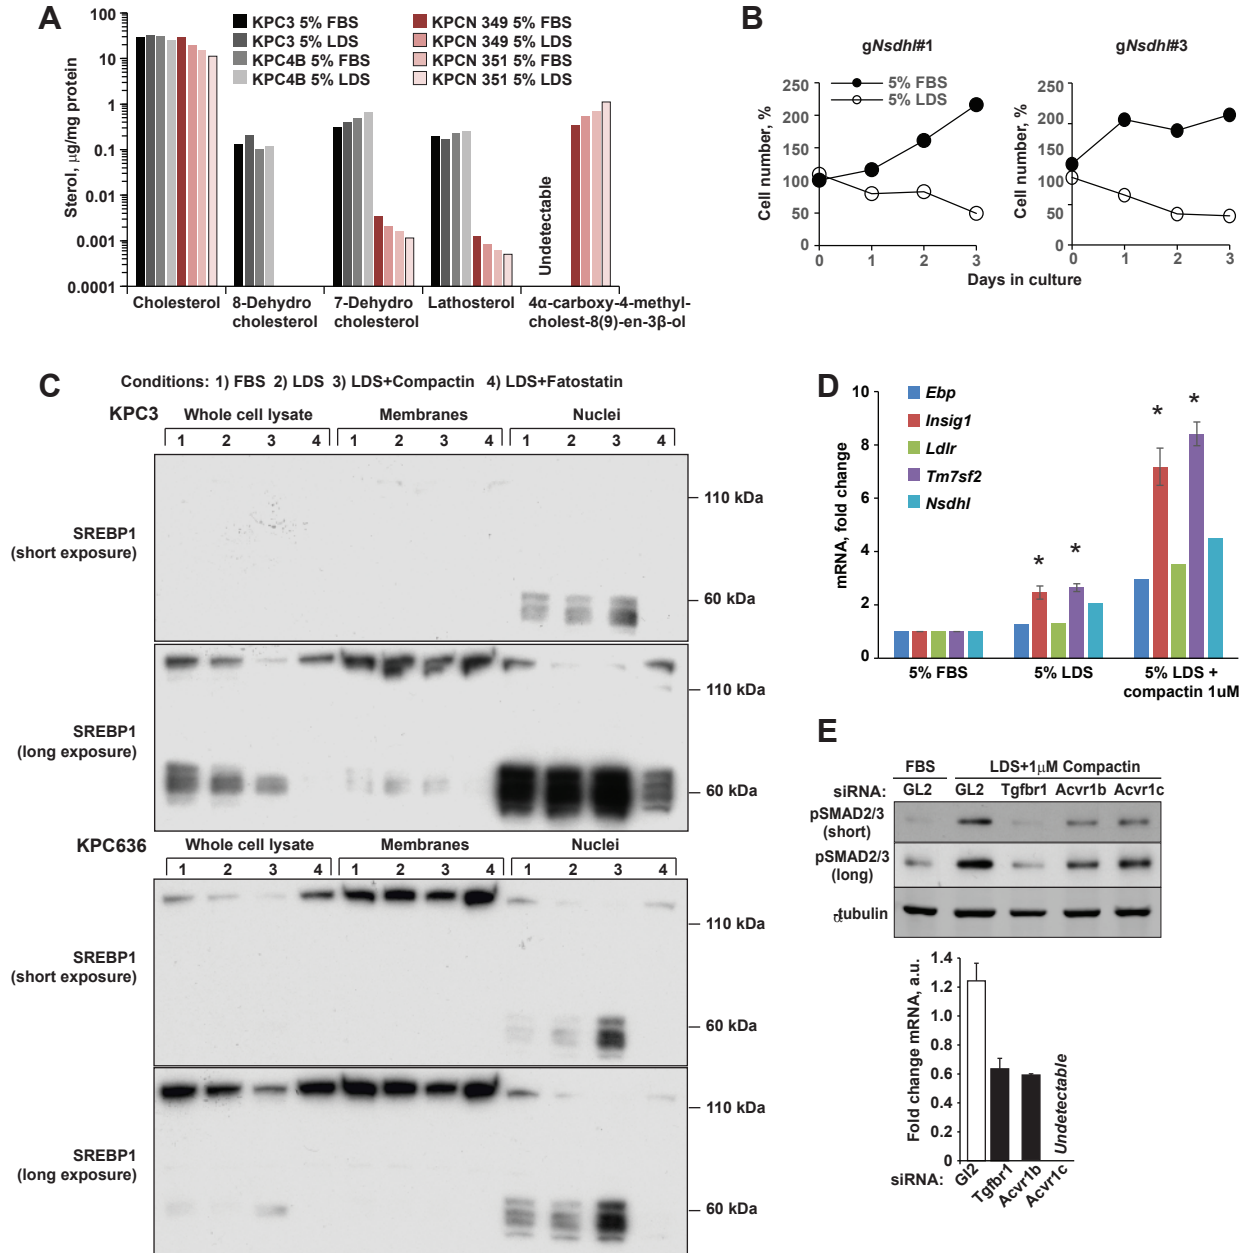

**Figure S5. Cholesterol pathway perturbation activates SREBP1 and TGF $\beta$  pathway signaling in PDAC cells. Related to figure 5.**

(A) Quantification of non-polar sterols by gas chromatography and mass spectrometry (GC-MS) in pancreatic carcinoma cell lines. Peak values were used to estimate sterol abundance, and results were normalized to total cellular protein content.

(B) Growth arrest of NSDHL-depleted KPC3 *Nsdhl*<sup>CRISPRi</sup> PDAC cells as assessed by Alamar blue viability in 5% FBS and 5%LDS.

(C) Western blot showing full length (MW ~120 kDa) and activated ~68 kDa nuclear fragment of SREBP1 in fractionated cellular lysates of KPC3 (epithelial) and KPC636 (mesenchymal) PDAC cells grown for 48 hours with 5% FBS, 5% LDS+compactin, and 5% LDS+ 20  $\mu$ M fatostatin.

(D) Quantitative RT-PCR determined expression of SREBP-regulated genes in KPC3 cells grown for 48 hours in DMEM supplemented with 5% FBS, 5% LDS, or 5% LDS with 1  $\mu$ M compactin.

(E) Effects of *Tgfbr1*, *Acvr1b*, or *Acvr1c* siRNA knockdown on phosphorylated SMAD2/3 expression in KPC3 cells transfected with siRNA and conditioned for 48 hours in 5% FBS or in 5% LDS with 1  $\mu$ M compactin. *Right*, RT-PCR validation of siRNA silencing of *Tgfbr1*, *Acvr1b* and *Acvr1c* in KPC3 PDAC cells.

**Figure S6**

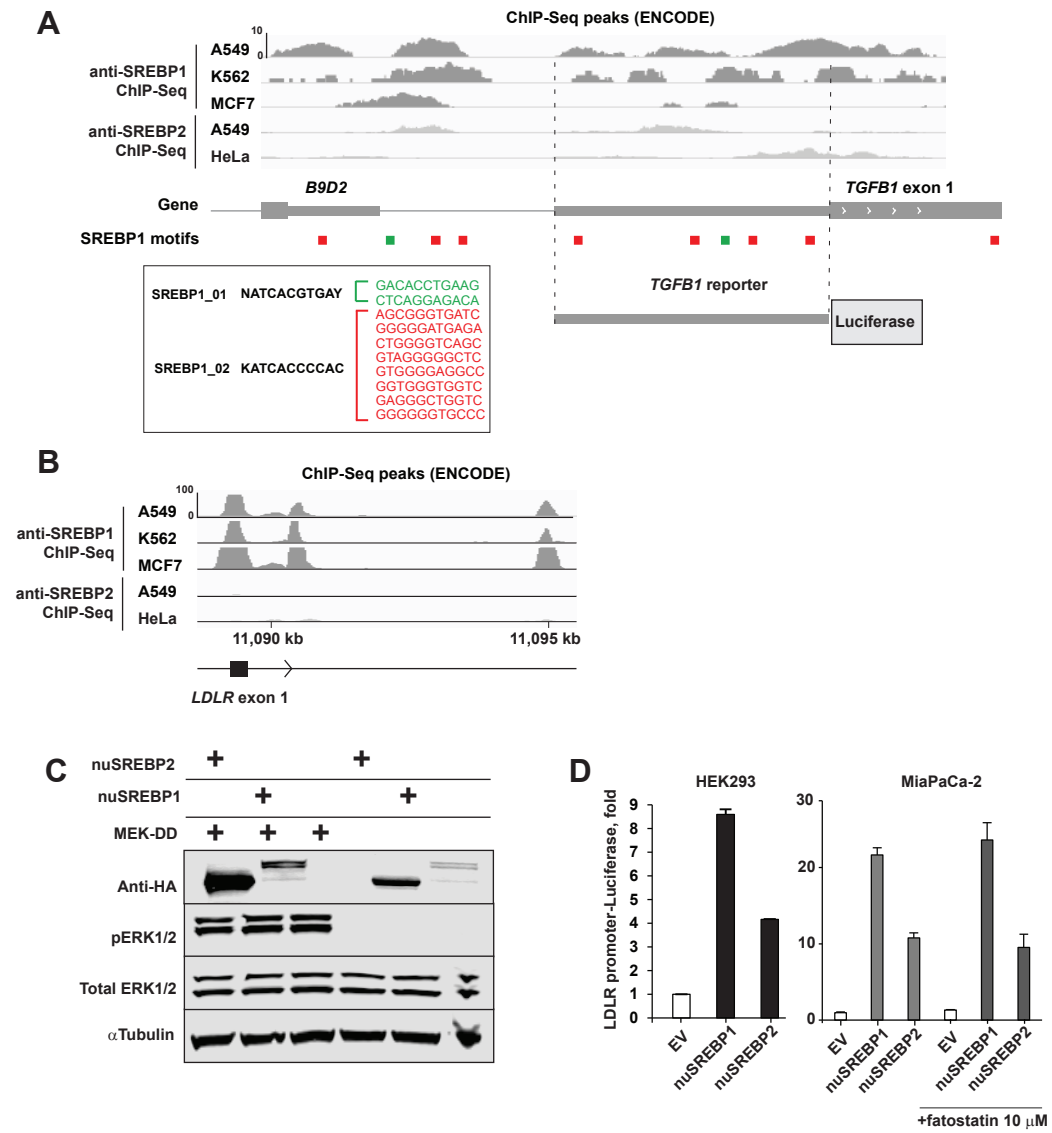

**Figure S6. Cholesterol depletion activates TGF pathway signaling via an autocrine mechanism. Related to figure 6.**

**(A)** Presence of SREBP1 binding motifs (sequences shown in *box*) overlapping with chromatin immunoprecipitation and DNA sequencing (ChIP-Seq) peaks using anti-SREBP1 antibodies in human cancer cell lines (ENCODE.org). Binding peaks (relative scale 0-10) in the promoter region of human *TGFB1* gene are shown (gray), and consensus binding motifs for SREBP1 located within peaks are indicated, whereas no SREBP2 binding motifs and background level of SREBP2 binding was found by ChIP-seq.

**(B)** Comparison of binding peaks (relative scale 0-100) for SREBP1 and SREBP2 to LDLR promoter as determined by ChIP-Seq (ENCODE.org).

**(C)** Western blot of HA-tagged nuclear (nu) fragments of mouse SREBP1 (aa 1-480) and mouse SREBP2 (aa 1-473), following transfection of HEK293 cells with corresponding expression plasmids. Phosphorylated ERK1/2 reflects expression of constitutively active form of MEK1 (mutations S218D/S222D).

**(D)** Functional activity of nuSREBP1 and nuSREBP2 expression plasmid constructs in HEK293 cells by co-transfection with *LDLR*-luciferase reporter. Empty vector lacking SREBP served as a negative control for background activity of luciferase reporter. Fatostatin at 10  $\mu$ M was used to block the endogenous SREBP activation. Data are represented as mean $\pm$ SEM.



Figure S7

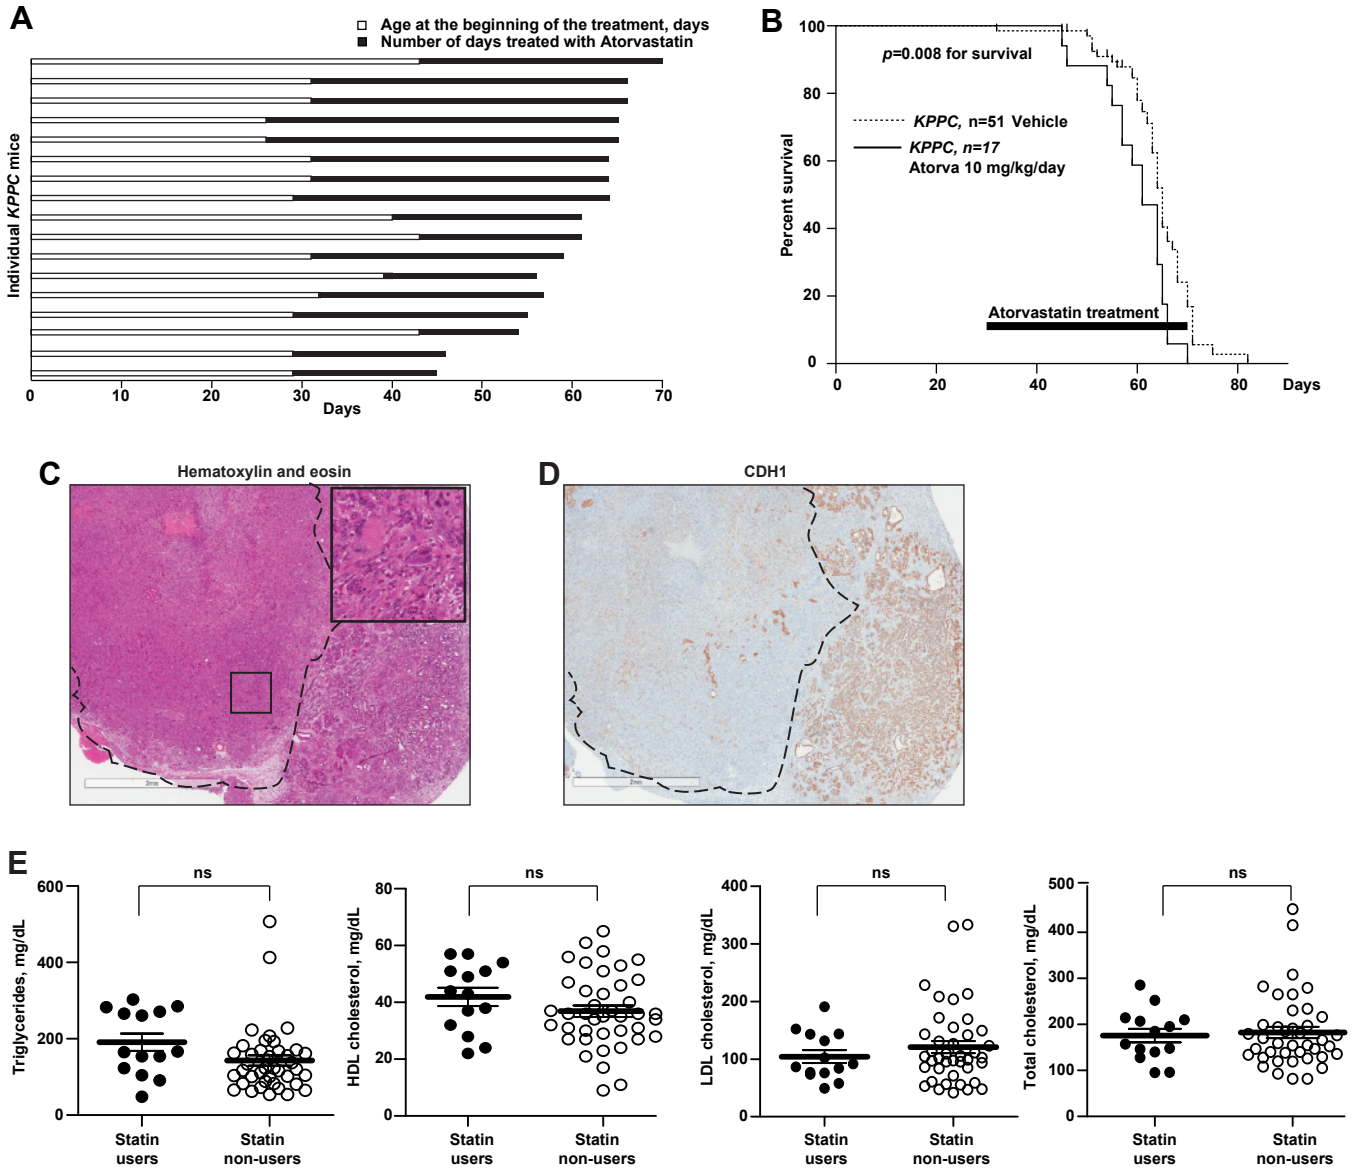

**Figure S7. Cholesterol homeostasis perturbation with statins in *KPPC* mice and PDAC patients. Related to figure 7.**

(A) Age at treatment onset and duration of atorvastatin treatment in a cohort of 17 *KPPC* mice. Each bar represents an individual animal. Pancreatic tissues were collected for histopathologic evaluation from all but 2 animals.

(B) Kaplan-Meyer survival probability of atorvastatin treated animals was compared to vehicle (water) *KPPC* control mice. A cohort of n=17, 4 week old *KPPC* mice received daily oral gavage of atorvastatin at 10 mg/kg/day until moribund. Survival of control animals (n=51) was estimated in the same colony with identical criteria for euthanasia in the setting of advanced pancreatic tumors.

(C) Hematoxylin and eosin and (D) E-cadherin (CDH1) staining of large focus of grade 4 basal PDAC marked by dashed line.

(E) Serum lipids levels in 55 PDAC patients separated by the statin usage status; Plots represent median (black bar) and range (25-75<sup>th</sup> percentile) of lipid level for individual cases shown as closed circles (statin users) and open circles (non-users); *ns*, not significant by two-way ANOVA test.

**Supplementary Table 6.** Primers for genotyping, CRISPRi and qPCR assays. Related to STAR Methods.

| <b>Primers for genotyping</b>                   | <b>Sequence (5' to 3')</b>                                |
|-------------------------------------------------|-----------------------------------------------------------|
| Nsdhl exon5 rearrangement: Forward              | gtg cta ctg tag act gaa cc                                |
| Nsdhl exon5 rearrangement: Reverse              | gtg tcc ttg caa tct cag tg                                |
| Cre detection: oIMR1084 Forward                 | gcg gtc tgg cag taa aaa cta tc                            |
| Cre detection: oIMR1085 Reverse                 | gtg aaa cag cat tgc tgt cac tt                            |
| Internal control for Cre: oIMR7338 Forward      | cta ggc cac aga att gaa aga tct                           |
| Internal control for Cre: oIMR7339 Reverse      | gta ggt gga aat tct agc atc atc c                         |
| NSDHL flox5 detection: Forward                  | gtg cta ctg tag act gaa cc                                |
| NSDHL flox5 detection: Reverse                  | tct cct gga tgc tct gat ac                                |
| LSL-KRas detection and rearrangement: Forward 1 | gtc ttt ccc cag cac agt gc                                |
| LSL-KRas detection and rearrangement: Forward 2 | agc tag cca cca tgg ctt gag taa gtc tgc a                 |
| LSL-KRas detection and rearrangement: Reverse 1 | ctc ttg cct acg cca cca gct c                             |
| Trp53 flox detection: oIMR8543 Forward          | ggt taa acc cag ctt gac ca                                |
| Trp53 flox detection: oIMR8544 Reverse          | gga ggc aga gac agt tgg ag                                |
| <b>SYBR Green Assays</b>                        | <b>Sequence (5' to 3')</b>                                |
| Grhl2                                           | For CCCATGACCTACCTCAACAAA<br>Rev CACCATCACCACACTCCTG      |
| Wnt7b                                           | For TCTCGTCGCTTTGTGGATG<br>Rev CGGTCCTCCAGAACCTTTC        |
| Wnt10b                                          | For GAATGCGGATCCACAACAAC<br>Rev CCCTCCAACAGGTCTTGAAT      |
| Rnf43                                           | For AAGGGAAGCTAATGCAGTCC<br>Rev AGCTTGACGATGCTGATGAA      |
| Sox17                                           | For TTTATGGTGTGGGCCAAAGA<br>Rev GCCTTCCAAGACTTGCCTAG      |
| Axin2                                           | For GTCTCTACCTCATTTTCCGAGAA<br>Rev TCCAGCTCCAGTTTCAGTTT   |
| Zo-1                                            | For ACCATGCCTAAAGCTGTCCCT<br>Rev TGTTAAAAATGCCACGAGCTGTAG |
| Tm7sf2                                          | For GGCCTCATTGGCTGGGTT<br>Rev AAGCCATTGACCAGCCACAT        |
| Dhcr24                                          | For GTGGAGAACTACCTGAAGACAAACC<br>Rev CGAAAGGGATGATGTCCTGG |
| Ebp                                             | For GTTTGCTGTGTGTACCTTCATTCA                              |

|                                                                              |                                                             |                        |                        |
|------------------------------------------------------------------------------|-------------------------------------------------------------|------------------------|------------------------|
|                                                                              | Rev ACGACGAAGCTGTCACTAAGGA                                  |                        |                        |
| Tgfb2                                                                        | For CTCAACACACCAAAGTCCTCA<br>Rev TGTTTCGATCTTGGGCGTATTT     |                        |                        |
| Tgfb3                                                                        | For CGCTACATAGGTGGCAAGAAT<br>Rev AGACCCAAGTTGGACTCTCT       |                        |                        |
| Insig1                                                                       | For CTAGTGCTCTTCTCATTGGCGT<br>Rev GTAAACCGACAACAGCCGCT      |                        |                        |
| Ldlr                                                                         | For AGGCTGTGGGCTCCATAGG<br>Rev TGCGGTCCAGGGTCACT            |                        |                        |
| Nsdhl                                                                        | For GGAGCGAGGCTATACTGTCAATG<br>Rev TTACACCTTTGAGAGCTGGGTACA |                        |                        |
| Pai1                                                                         | For GTCTTCCTCCACAGCCTTT<br>Rev CCATGAAGAGGATTGTCTCTGTC      |                        |                        |
| Zeb1                                                                         | For CCAAACGGAAACCAGGATGA<br>Rev GGTCACATGCATACATTCCATTC     |                        |                        |
| Acvr1b                                                                       | For GAAGATGCAATTCTGGAGGAGT<br>Rev CGTAGCTTCTGGTCACATACAA    |                        |                        |
| Acvr1c                                                                       | For TCCCGAAATGCTTGATGATACA<br>Rev TACTCCTCAACAACCTCCTCCA    |                        |                        |
| <b>Taqman Assays from Life Technologies</b>                                  | <b>Cat#</b>                                                 |                        |                        |
| Zeb2                                                                         | Mm00497193_m1                                               |                        |                        |
| Cdh1                                                                         | Mm00486918_m1                                               |                        |                        |
| Tgfb1                                                                        | Mm03024053_m1                                               |                        |                        |
| Wnt5a                                                                        | Mm00437347_m1                                               |                        |                        |
| Tgfb1                                                                        | Mm03024053_m1                                               |                        |                        |
| Snail2                                                                       | Mm00441531_m1                                               |                        |                        |
| Tgfbr1                                                                       | Mm00436964_m1                                               |                        |                        |
| <b>Primers for site-directed mutagenesis</b>                                 | <b>Sequence (5' to 3')</b>                                  |                        |                        |
| SREBP1 Ala Forward                                                           | CTTGTCCCCTCCACCAGCGGCACCCGCTGC                              |                        |                        |
| SREBP1 Ala Reverse                                                           | GCAGCGGGTGCCGCTGGTGGAGGGGACAAG                              |                        |                        |
| SREBP1 Asp Forward                                                           | CTTGTCCCCTCCACCAGATGCACCCGCTGCTTTAAAG                       |                        |                        |
| SREBP1 Asp Reverse                                                           | CTTTAAAGCAGCGGGTGCATCTGGTGGAGGGGACAAG                       |                        |                        |
| <b>Primers for chromatin immunoprecipitation (ChIP) and quantitative PCR</b> |                                                             |                        |                        |
| primers position is relative to transcription start site (+1)                |                                                             |                        |                        |
| Mouse <i>Tgfb1</i>                                                           | Forward                                                     | Reverse                |                        |
| -3204                                                                        | -3032                                                       | TGTCAGTGCAGCTTTTCTGG   | GCCACATTTGGAAACAGGTC   |
| -2658                                                                        | -2510                                                       | CTGGCCTTAGCTGTCTTCC    | CAAAAAATGGTCCCGGAAAGAG |
| -2313                                                                        | -2118                                                       | CACTGTGCTCTCAGGGTTG    | AGGCTAGAACGGGGAGTC     |
| -1934                                                                        | -1778                                                       | GTGTGTGCCAAAATGTCACC   | ACATTTGGGGCTGAACACT    |
| -1506                                                                        | -1293                                                       | CTCCAAGCATTGGACTGTCA   | ACCTCCCTTTGTGGTCTCT    |
| -1278                                                                        | -1131                                                       | CTTGACTTGAGAGGTTGGACTT | TTGCCTGAATTTCTCTCTGG   |
| -831                                                                         | -648                                                        | GCACGCAGATACCATCTACA   | CTTCACTGCTGTGCCATTATG  |
| -531                                                                         | -357                                                        | TAGAAAGGGCTGTGGGTTG    | GCAGACTTTGCGGATGAGA    |
| -274                                                                         | -97                                                         | GACCCTTCAACAACCTCCCAA  | GCACTGTCTTCATCTTAGCGT  |

|                                                                           |        |                                 |                                 |
|---------------------------------------------------------------------------|--------|---------------------------------|---------------------------------|
| +51                                                                       | +176   | CGCGGATCCTCCAGACA               | TCCTCGGCTGCTCCTTT               |
| +267                                                                      | +375   | GACGAGCTGGTTGAGAGAAG            | CTGTCTGGAGTCCTCAGGT             |
| +390                                                                      | +564   | GTGGACACTCGATCGCTAC             | AGAGAGGGTCCTGGGATG              |
| +717                                                                      | +826   | GCTTTCTCCCTCAACCTCAA            | CTCGGCAAAGGTGGGATG              |
| <i>Mouse Ldlr</i>                                                         |        |                                 |                                 |
| -38                                                                       | +60    | CGCTCAGTGAGGTGAAGATT            | GCACGCCAGAGTCATT                |
| <b>Sequences of guide RNA for CRISPRi targeting of mouse <i>Nsdh1</i></b> |        |                                 |                                 |
| Position                                                                  | Strand | Forward                         | Reverse                         |
| 72918667                                                                  | -      | <b>CACCGGCCGGTTGTCTGCAAGCTG</b> | <b>AAACCAGCTTGCAGACAACCGGCC</b> |
| 72918711                                                                  | +      | <b>CACCGCACACGCAGCAGCCTCTAA</b> | <b>AAACTTAGAGGCTGCTGCGTGTGC</b> |
| 72918630                                                                  | +      | <b>CACCGACCGGCAACCAGAGAAGTC</b> | <b>AAACGACTTCTCTGGTTGCCGGTC</b> |
